# Supplementary material for: Equity in prenatal healthcare services globally: an umbrella review
Source: PubMed Central journal article supplement (PMC10926563; doi:10.1186/s12884-024-06388-0), 2024-03-11
Supplement: 12884_2024_6388_MOESM4_ESM.pdf [file 12884_2024_6388_MOESM4_ESM.pdf]

**Characteristics of Included Studies**

| <b>First Author Last Name</b> | <b>Publication Year</b> | <b>First Author Country</b> | <b>Title</b>                                                                                                              | <b>Aim</b>                                                                                                                                                                                             | <b>Countries of studies analyzed within included reviews</b> | <b>Population Focus</b> | <b>Health Services Focus</b> | <b>Outcomes Relevant to PROGRESS-Plus</b>                | <b>Funding Source Reported</b> |
|-------------------------------|-------------------------|-----------------------------|---------------------------------------------------------------------------------------------------------------------------|--------------------------------------------------------------------------------------------------------------------------------------------------------------------------------------------------------|--------------------------------------------------------------|-------------------------|------------------------------|----------------------------------------------------------|--------------------------------|
| Rowe                          | 2003                    | UK                          | Social class, ethnicity and attendance for antenatal care in the United Kingdom: a systematic review                      | To address whether there are social class/ethnic inequalities in attendance of prenatal care in the United Kingdom for pregnant women.                                                                 | UK                                                           | Prenatal only           | Prenatal Testing/ Screening  | Occupation, Race, Ethnicity, Culture, Language           | Yes                            |
| Rowe                          | 2004                    | UK                          | Social and ethnic inequalities in the offer and uptake of prenatal screening and diagnosis in the UK: a systematic review | To address whether there are social inequalities in the offer/uptake of prenatal testing in the United Kingdom for pregnant women.                                                                     | UK                                                           | Prenatal only           | Prenatal Testing/ Screening  | Socioeconomic Status, Race, Ethnicity, Culture, Language | Yes                            |
| Lagarde                       | 2007                    | UK                          | Conditional Cash Transfers for Improving Uptake of Health Interventions in Low- and Middle- Income Countries              | To assess the effectiveness of conditional cash transfers in improving access to and use of health services and improving health outcomes, in low- and middle-income countries for women and children. | Mexico, Nicaragua, Malawi, Honduras, Brazil, Colombia        | Maternal & Child Health | Demand Side Financing        | Socioeconomic Status                                     | Yes                            |

*Equity in prenatal healthcare services globally: An umbrella review*

| First Author Last Name | Publication Year | First Author Country | Title                                                                                                                                                            | Aim                                                                                                                                                                                 | Countries of studies analyzed within included reviews                                                                                                                                                                                                          | Population Focus | Health Services Focus | Outcomes Relevant to PROGRESS-Plus                                           | Funding Source Reported |
|------------------------|------------------|----------------------|------------------------------------------------------------------------------------------------------------------------------------------------------------------|-------------------------------------------------------------------------------------------------------------------------------------------------------------------------------------|----------------------------------------------------------------------------------------------------------------------------------------------------------------------------------------------------------------------------------------------------------------|------------------|-----------------------|------------------------------------------------------------------------------|-------------------------|
| Say                    | 2007             | Switzerland          | A systematic review of inequalities in the use of maternal health care in developing countries: examining the scale of the problem and the importance of context | To assess the evidence of key maternal healthcare interventions in developing countries by women's place of residence and socioeconomic status for pregnant women aged 15-49 years. | Turkey, Tajikistan, Nepal, Kenya, Ethiopia, India, Paraguay, Uganda, United Republic of Tanzania, China, Bangladesh, Lao People's Democratic Republic, Ghana, Jamaica, Morocco, Belize, Viet Nam, Guatemala, Zimbabwe, Botswana, South Africa, Brazil, Ecuador | Prenatal only    | General               | Place of Residence, Race, Ethnicity, Culture, Language, Socioeconomic Status | Yes                     |
| Lagarde                | 2008             | UK                   | The impact of user fees on health service utilization in low- and middle-income countries: how strong is the evidence?                                           | To assess the effect on health service utilization of user fees in low- and middle-income countries.                                                                                | Burkina Faso, Kenya, Papua New Guinea, Niger, Cameroon, Uganda, South Africa, Columbia, Sudan, Lesotho, Gabon, Ecuador                                                                                                                                         | General          | User Fees             | Socioeconomic Status                                                         | Yes                     |
| Lee                    | 2009             | USA<br>South Africa  | Linking families and facilities for care at birth: What works to avert intrapartum-related deaths?                                                               | To describe the evidence for interventions to link mothers with skilled care during pregnancy, labor, and birth for                                                                 | Bolivia, Nepal, Bangladesh, Pakistan, India, Burkino Faso, South Africa, Ghana, Nigeria, Guatemala,                                                                                                                                                            | Maternal Health  | General               | Socioeconomic Status, Race, Ethnicity, Culture, Language, Social Capital,    | Not Reported            |

*Equity in prenatal healthcare services globally: An umbrella review*

| First Author Last Name | Publication Year | First Author Country | Title                                                                                                       | Aim                                                                                                                                                                         | Countries of studies analyzed within included reviews                                                                                                                                                                             | Population Focus        | Health Services Focus   | Outcomes Relevant to PROGRESS-Plus | Funding Source Reported |
|------------------------|------------------|----------------------|-------------------------------------------------------------------------------------------------------------|-----------------------------------------------------------------------------------------------------------------------------------------------------------------------------|-----------------------------------------------------------------------------------------------------------------------------------------------------------------------------------------------------------------------------------|-------------------------|-------------------------|------------------------------------|-------------------------|
|                        |                  |                      |                                                                                                             | mothers in low- and middle-income settings.                                                                                                                                 | Gambia, DR of Congo, Kenya, Tanzania, Rwanda, Mauritania, Senegal, Mali, Honduras, Mexico, India, Cambodia, Sierra Leone, Malawi, Uganda, Ethiopia, Zimbabwe, Cuba,                                                               |                         |                         | Place of Residence                 |                         |
| Darmstadt              | 2009             | USA                  | 60 million non-facility births: Who can deliver in community settings to reduce intrapartum-related deaths? | To review the evidence for the effect of care by different community groups during pregnancy and childbirth for pregnant women and neonates in low- middle-income settings. | Nepal, Vietnam, Indonesia, England, Zambia, Bangladesh, Benin, Ecuador, Jamaica, Rwanda, Nicaragua, China, Sudan, Malaysia, Mozambique, Sweden, Ghana, India, Guatemala, Gambia, Argentina, DR Congo, Guatamala, Pakistan, Zambia | Maternal & Child Health | Community Organizations | Education                          | No Funding              |

*Equity in prenatal healthcare services globally: An umbrella review*

| <b>First Author Last Name</b> | <b>Publication Year</b> | <b>First Author Country</b> | <b>Title</b>                                                                                                                             | <b>Aim</b>                                                                                                                                                                                                                                           | <b>Countries of studies analyzed within included reviews</b>                                                                                                                                                             | <b>Population Focus</b> | <b>Health Services Focus</b> | <b>Outcomes Relevant to PROGRESS-Plus</b>                                                               | <b>Funding Source Reported</b> |
|-------------------------------|-------------------------|-----------------------------|------------------------------------------------------------------------------------------------------------------------------------------|------------------------------------------------------------------------------------------------------------------------------------------------------------------------------------------------------------------------------------------------------|--------------------------------------------------------------------------------------------------------------------------------------------------------------------------------------------------------------------------|-------------------------|------------------------------|---------------------------------------------------------------------------------------------------------|--------------------------------|
| Lewin                         | 2010                    | Norway                      | Lay health workers in primary and community health care for maternal and child health and the management of infectious diseases (review) | To assess the effects of lay health worker (LHW) interventions in primary and community health care on any population, with an intent to improve maternal and child health and the management of infectious diseases.                                | Australia, Canada, Ireland, New Zealand, UK, USA, Brazil, China, India, Mexico, Philipines, Thailand, Turkey, South Africa, Bangladesh, Burkina Faso, Ethiopia, Ghana, Iraq, Jamaica, Nepal, Pakistan, Tanzania, Vietnam | General                 | Lay/Community Health Workers | Education, Socioeconomic Status, Race, Ethnicity, Culture, Language, Place of Residence, Social Capital | Yes                            |
| DeMaio                        | 2010                    | Canada                      | Immigration as pathogenic: a systematic review of the health of immigrants to Canada                                                     | To explore and highlight the state of current knowledge on the health transition effects of immigrants to Canada compared to a Canadian-born population and how this is influenced by ethnicity, race, socioeconomic status, and contextual factors. | Canada                                                                                                                                                                                                                   | General                 | General                      | Race, Ethnicity, Culture, Language, Socioeconomic Status                                                | No Funding                     |

*Equity in prenatal healthcare services globally: An umbrella review*

| <b>First Author Last Name</b> | <b>Publication Year</b> | <b>First Author Country</b> | <b>Title</b>                                                                                                                                                                             | <b>Aim</b>                                                                                                                                                                                                                                                                                                                                  | <b>Countries of studies analyzed within included reviews</b>                           | <b>Population Focus</b> | <b>Health Services Focus</b>       | <b>Outcomes Relevant to PROGRESS-Plus</b>                | <b>Funding Source Reported</b> |
|-------------------------------|-------------------------|-----------------------------|------------------------------------------------------------------------------------------------------------------------------------------------------------------------------------------|---------------------------------------------------------------------------------------------------------------------------------------------------------------------------------------------------------------------------------------------------------------------------------------------------------------------------------------------|----------------------------------------------------------------------------------------|-------------------------|------------------------------------|----------------------------------------------------------|--------------------------------|
| Feijen-de Jong                | 2011                    | Netherlands                 | Determinants of late and/or inadequate use of prenatal healthcare in high-income countries: a systematic review                                                                          | To review the current evidence of the determinants of use of prenatal healthcare in high-income countries for pregnant women.                                                                                                                                                                                                               | USA, Canada, UK, Finland                                                               | Prenatal only           | General                            | Race, Ethnicity, Culture, Language, Socioeconomic Status | Yes                            |
| Hollowell                     | 2011                    | UK                          | The effectiveness of antenatal care programmes to reduce infant mortality and preterm birth in socially disadvantaged and vulnerable women in high-income countries: a systematic review | To identify the best available evidence on the effectiveness of interventions focused on antenatal care to reduce infant mortality in socially disadvantaged groups of women and other specific groups, such as teenagers and substance abusers, with risk factors for adverse birth outcomes strongly associated with social disadvantage. | USA, Australia, UK, Canada, Greece                                                     | Prenatal only           | General                            | Socioeconomic Status, Place of Residence                 | Yes                            |
| Widmer                        | 2011                    | Switzerland                 | The role of faith-based organizations in maternal and newborn health care in Africa                                                                                                      | To assess the work of faith-based organizations in the area of maternal/newborn healthcare in Africa during the past 2 decades,                                                                                                                                                                                                             | Ghana, Malawi, Mozambique, Nigeria, Uganda, and Tanzania, Democratic Republic of Congo | Maternal & Child Health | Faith-based/Community organization | Religion                                                 | Not Reported                   |

*Equity in prenatal healthcare services globally: An umbrella review*

| First Author Last Name | Publication Year | First Author Country | Title                                                                                                                                                      | Aim                                                                                                                                                                                                                                               | Countries of studies analyzed within included reviews                                  | Population Focus | Health Services Focus       | Outcomes Relevant to PROGRESS-Plus | Funding Source Reported |
|------------------------|------------------|----------------------|------------------------------------------------------------------------------------------------------------------------------------------------------------|---------------------------------------------------------------------------------------------------------------------------------------------------------------------------------------------------------------------------------------------------|----------------------------------------------------------------------------------------|------------------|-----------------------------|------------------------------------|-------------------------|
| Victoria               | 2012             | Brazil               | Scaling up maternal nutrition programs to improve birth outcomes: A review of implementation issues                                                        | To analyze the evidence on impact and cost-effectiveness of nutrition programs for maternal care during pregnancy.                                                                                                                                | Nicaragua, Nepal, India, Bangladesh, Madagascar, Mexico, Nigeria, South Africa, Brazil | Prenatal only    | Nutrition                   | Socioeconomic Status               | Not Reported            |
| Lassi                  | 2012             | Pakistan             | Community-based intervention packages for reducing maternal morbidity and mortality and improving neonatal outcomes                                        | To assess the effectiveness of community-based interventions in reducing maternal and neonatal morbidity and mortality and improving neonatal outcomes, and the impact of different interventions for pregnant women in underdeveloped countries. | Bangladesh, india, indonesia, nepal, pakistan, burkina faso, gambia, greece, bolivia   | Prenatal only    | Community Organizations     | Social Capital                     | Yes                     |
| Yu                     | 2012             | UK                   | A systematic review of issues around antenatal screening and prenatal diagnostic testing for genetic disorders: women of Asian origin in western countries | To identify, describe and critique literature on antenatal screening and prenatal diagnostic testing for genetic conditions for women of Asian origin in western countries.                                                                       | UK, Australia, USA, Canada,                                                            | Prenatal only    | Prenatal Testing/ Screening | Race, Ethnicity, Culture, Language | Not Reported            |

*Equity in prenatal healthcare services globally: An umbrella review*

| First Author Last Name | Publication Year | First Author Country | Title                                                                                                                                                                             | Aim                                                                                                                                                                                                                                                                                                      | Countries of studies analyzed within included reviews                                                   | Population Focus        | Health Services Focus | Outcomes Relevant to PROGRESS-Plus                                                           | Funding Source Reported |
|------------------------|------------------|----------------------|-----------------------------------------------------------------------------------------------------------------------------------------------------------------------------------|----------------------------------------------------------------------------------------------------------------------------------------------------------------------------------------------------------------------------------------------------------------------------------------------------------|---------------------------------------------------------------------------------------------------------|-------------------------|-----------------------|----------------------------------------------------------------------------------------------|-------------------------|
| Murray                 | 2012             | United Kingdom       | Demand-side financing measures to increase maternal health service utilisation and improve health outcomes: a systematic review of evidence from low- and middle-income countries | To assess the effects of demand-side financing (DSF) interventions on maternal health service utilisation and maternal health outcomes for poor, rural or socially excluded women of all ages who were either pregnant or within 42 days of conclusion of pregnancy in low- and middle-income countries. | Turkey, Bangladesh, Kenya, India, Indonesia, Cambodia, Ghana, Bolivia, Tanzania, Uganda, Nepal, Armenia | Perinatal               | Demand Side Financing | Place of Residence, Socioeconomic Status, Social Capital, Race, Ethnicity, Culture, Language | Yes                     |
| Malqvist               | 2012             | Sweden               | Causes and determinants of inequity in maternal and child health in Vietnam                                                                                                       | To promote policy action through mapping the known causes and determinants of inequity in maternal and child health in Vietnam.                                                                                                                                                                          | N/R                                                                                                     | Maternal & Child Health | General               | Race, Ethnicity, Culture, Language, Socioeconomic Status, Gender/Sex, Education              | Yes                     |
| Balaam                 | 2013             | UK                   | A qualitative review of migrant women's perceptions of their needs and experiences related to pregnancy and childbirth                                                            | To synthesize evidence of migrant women's (refugees, illegal, asylum-seekers, economic migrants, maternity care experiences, etc.) perceptions of their health needs and experiences in relation to pregnancy and childbirth.                                                                            | Sweden, UK, Switzerland, Norway, Ireland, Greece.                                                       | Perinatal               | General               | Race, Ethnicity, Culture, Language, Religion, Gender/Sex, Social Capital                     | Yes                     |

*Equity in prenatal healthcare services globally: An umbrella review*

| <b>First Author Last Name</b> | <b>Publication Year</b> | <b>First Author Country</b> | <b>Title</b>                                                                                                                         | <b>Aim</b>                                                                                                                                                                                   | <b>Countries of studies analyzed within included reviews</b>                                                                                                                         | <b>Population Focus</b> | <b>Health Services Focus</b> | <b>Outcomes Relevant to PROGRESS-Plus</b>                           | <b>Funding Source Reported</b> |
|-------------------------------|-------------------------|-----------------------------|--------------------------------------------------------------------------------------------------------------------------------------|----------------------------------------------------------------------------------------------------------------------------------------------------------------------------------------------|--------------------------------------------------------------------------------------------------------------------------------------------------------------------------------------|-------------------------|------------------------------|---------------------------------------------------------------------|--------------------------------|
| Glassman                      | 2013                    | USA                         | Impact of Conditional Cash Transfers on Maternal and Newborn Health                                                                  | To assess the effect of Conditional Cash Transfers (CCT) on maternal and neonatal health outcomes, the use or provision of maternal health services, or the care-seeking behaviour by women. | El Salvador, Honduras, Nepal, Mexico, Guatemala, Uruguay, India                                                                                                                      | Maternal & Child Health | Demand Side Financing        | Socioeconomic Status                                                | Not Reported                   |
| Knight                        | 2013                    | UK                          | Why Are Women Dying When They Reach Hospital on Time? A Systematic Review of the 'Third Delay'                                       | To identify and categorise facility-level barriers (phase III delays) to the provision of evidence-based emergency obstetric care in developing countries.                                   | Morocco, Nicaragua, Sri Lanka, Niger, Rwanda, Tanzania, Peru, Pakistan, Vietnam, Bhutan, Cameroon, India, Bolivia, El Savador, Honduras, Gabon, Guinneau-Bissau, Gambia, Benin, Chad | Perinatal               | General                      | Religion, Socioeconomic Status, Race, Ethnicity, Culture, Language  | No Funding                     |
| Byrne                         | 2013                    | Australia                   | Looking Beyond Supply: A Systematic Literature Review of Demand-Side Barriers to Health Service Utilization in the Moutains of Nepal | To identify demand-side barriers to the utilization of formal reproductive, maternal, newborn, or child services in the Mountains ecological region of Nepal (low-middle-income).            | Nepal                                                                                                                                                                                | Maternal & Child Health | General                      | Education, Race, Ethnicity, Culture, Language, Plus-Age, Gender/Sex | Yes                            |



*Equity in prenatal healthcare services globally: An umbrella review*

| First Author Last Name | Publication Year | First Author Country | Title                                                                                                                                            | Aim                                                                                                                                                                                                                                       | Countries of studies analyzed within included reviews                                                                                                                                                        | Population Focus        | Health Services Focus | Outcomes Relevant to PROGRESS-Plus                              | Funding Source Reported |
|------------------------|------------------|----------------------|--------------------------------------------------------------------------------------------------------------------------------------------------|-------------------------------------------------------------------------------------------------------------------------------------------------------------------------------------------------------------------------------------------|--------------------------------------------------------------------------------------------------------------------------------------------------------------------------------------------------------------|-------------------------|-----------------------|-----------------------------------------------------------------|-------------------------|
| Chamberlain            | 2013             | Australia            | Psychosocial interventions for supporting women to stop smoking in pregnancy (Review)                                                            | To assess the effects of smoking cessation interventions during pregnancy on smoking behaviour and perinatal health outcomes.                                                                                                             | United States, England, Argentina, Brazil, Cuba, Mexico, New Zealand, Newcastle, New South Wales, Australia, United Kingdom, Columbia, Norway, Netherlands, Sweden, Canada, Poland, Scotland, Ireland, Spain | Perinatal               | Smoking Cessation     | Social Capital                                                  | Yes                     |
| McArthur               | 2013             | Australia            | Maternal mortality in Cambodia, Thailand, Malaysia and Sri Lanka: a systematic review of local and national policy and practice and initiatives. | To review health system/service delivery structures and policies that have reduced maternal mortality for pregnant and birthing women who received care from a skilled birth attendant within Cambodia, Malaysia, Thailand and Sri Lanka. | Sri Lanka, Cambodia, Thailand, Malaysia                                                                                                                                                                      | Perinatal               | General               | Place of Residence, Socioeconomic Status, Gender/Sex, Education | Not Reported            |
| Malqvist               | 2013             | Sweden               | Targeted Interventions for Improved Equity in Maternal and Child Health in Low- and                                                              | To display the evidence of targeted maternal and child health interventions in their effectiveness to reduce inequity in                                                                                                                  | Pakistan, Bangladesh, Nicaragua, Mexico, Cambodia, India, Honduras, Peru, Kenya                                                                                                                              | Maternal & Child Health | General               | Socioeconomic Status                                            | Yes                     |

*Equity in prenatal healthcare services globally: An umbrella review*

| First Author Last Name | Publication Year | First Author Country | Title                                                                                                                                  | Aim                                                                                                                                                                                                                              | Countries of studies analyzed within included reviews  | Population Focus        | Health Services Focus        | Outcomes Relevant to PROGRESS-Plus | Funding Source Reported |
|------------------------|------------------|----------------------|----------------------------------------------------------------------------------------------------------------------------------------|----------------------------------------------------------------------------------------------------------------------------------------------------------------------------------------------------------------------------------|--------------------------------------------------------|-------------------------|------------------------------|------------------------------------|-------------------------|
|                        |                  |                      | Middle-Income Settings: A Systematic Review and Meta-Analysis                                                                          | low and middle-income countries.                                                                                                                                                                                                 |                                                        |                         |                              |                                    |                         |
| Ehiri                  | 2014             | USA                  | Training and deployment of lay refugee/internally displaced persons to provide basic health services in camps: a systematic review     | To assess the effects of interventions that train and deploy lay refugees/internally displaced women ( $\geq 15$ years) to provide basic health service to maternal and child populations in refugee/internally displaced camps. | Guinea, Belize, Myanmar, Thai-Myanmar Border, Tanzania | Maternal & Child Health | Lay/Community Health Workers | Social Capital                     | No Funding              |
| Benova                 | 2014             | UK                   | Socio-Economic Gradients in Maternal and Child Health-Seeking Behaviours in Egypt: Systematic Literature Review and Evidence Synthesis | To identify and synthesize evidence about the existence, magnitude and trends in socio-economic gradients in health-seeking behaviours related to maternal and child health in Egypt.                                            | Egypt                                                  | Maternal & Child Health | General                      | Socioeconomic Status, Education    | Yes                     |
| Small                  | 2014             | Australia            | Immigrant and non-immigrant women's experiences of maternity care: a systematic and comparative                                        | To compare immigrant (women not born in the country they are giving birth) and non-immigrant women's                                                                                                                             | Australia, Canada, Sweden, United Kingdom, USA         | Perinatal               | General                      | Race, Ethnicity, Culture, Language | Not Reported            |

*Equity in prenatal healthcare services globally: An umbrella review*

| First Author Last Name | Publication Year | First Author Country | Title                                                                                                                                                   | Aim                                                                                                                                                                                                                                                     | Countries of studies analyzed within included reviews                                                                                                                 | Population Focus        | Health Services Focus | Outcomes Relevant to PROGRESS-Plus                       | Funding Source Reported |
|------------------------|------------------|----------------------|---------------------------------------------------------------------------------------------------------------------------------------------------------|---------------------------------------------------------------------------------------------------------------------------------------------------------------------------------------------------------------------------------------------------------|-----------------------------------------------------------------------------------------------------------------------------------------------------------------------|-------------------------|-----------------------|----------------------------------------------------------|-------------------------|
|                        |                  |                      | review of studies in five countries                                                                                                                     | experiences and needs in maternity care, within and across countries.                                                                                                                                                                                   |                                                                                                                                                                       |                         |                       |                                                          |                         |
| Byrne                  | 2014             | Australia            | What Works? Strategies to Increase Reproductive, Maternal and Child Health in Difficult to Access Mountainous Locations: A Systematic Literature Review | To identify strategies to address barriers to care-seeking, acceptability, satisfaction, and/or utilization of reproductive, maternal, newborn, and child service in low- and lower-middle income countries, in difficult-to-reach mountainous regions. | Afghanistan, Bolivia, Ethiopia, Guatemala, Indonesia, Kenya, Kyrgyzstan, Nepal, Pakistan, Papua New Guinea and Tajikistan.                                            | Maternal & Child Health | General               | Socioeconomic Status, Place of Residence, Social Capital | Yes                     |
| Gopalan                | 2014             | UK                   | Health sector demand-side financial incentives in low- and middle-income countries: A systematic review on demand- and supply-side effects              | To investigate the demand- and supply-side effects of consumer-led financial incentives in low- and middle-income countries                                                                                                                             | Mexico, Honduras, Brazil, Columbia, Nicaragua, Chile, Turkey, Jamaica, Latin America, Mexico, Ecuador, Malawi, China, India, Tanzania, Nepal, Bangladesh, Madagascar. | General                 | Demand Side Financing | Socioeconomic Status, Place of Residence                 | Not Reported            |

*Equity in prenatal healthcare services globally: An umbrella review*

| First Author Last Name | Publication Year | First Author Country | Title                                                                                                                                                                            | Aim                                                                                                                                                                                                                                                | Countries of studies analyzed within included reviews                                                                                               | Population Focus        | Health Services Focus                                 | Outcomes Relevant to PROGRESS-Plus   | Funding Source Reported |
|------------------------|------------------|----------------------|----------------------------------------------------------------------------------------------------------------------------------------------------------------------------------|----------------------------------------------------------------------------------------------------------------------------------------------------------------------------------------------------------------------------------------------------|-----------------------------------------------------------------------------------------------------------------------------------------------------|-------------------------|-------------------------------------------------------|--------------------------------------|-------------------------|
| Yuan                   | 2014             | Sweden<br>China      | What interventions are effective on reducing inequalities in maternal and child health in low- and middle-income settings? A systematic review                                   | To collect evidence about the differential effects of interventions on different sociodemographic groups in order to identify interventions that were effective in reducing maternal or child health inequalities in low-middle-income countries.  | Brazil, India, Guinea-Bissau, Bangladesh, Nepal, South Africa, Indonesia, Nigeria, Uganda, Philippines, Tanzania, Indiana, Zambia, China, Colombia. | Maternal & Child Health | General                                               | Socioeconomic Status, Social Capital | Yes                     |
| Muralidharan           | 2015             | India                | Transforming Gender Norms, Roles, and Power Dynamics for Better Health Evidence from a Systematic Review of Gender-integrated Health Programs in Low-and Middle-Income Countries | To identify and assess gender-accommodating and gender-transformative strategies in health programs in low- middle-income countries and understand their impact on reproductive, maternal, neonatal, child, and adolescent health health outcomes. | India, Bangladesh, Nepal, Afghanistan, Pakistan, Bhutan, Sri Lanka, Maldives                                                                        | General                 | Gender/Role-Accommodating & Transformative Strategies | Gender/Sex, Social Capital           | Yes                     |
| Caliskan               | 2015             | Turkey               | Equity in maternal health care service utilization: a systematic review for developing countries                                                                                 | To explore progress of equity in the utilization of maternal health care services in developing countries for                                                                                                                                      | Bangladesh, Burkina Faso, Cambodia, China, Egypt, Ethiopia, India, Kenya, Namibia, Nigeria,                                                         | Perinatal               | General                                               | Socioeconomic Status, Education      | Not Reported            |

*Equity in prenatal healthcare services globally: An umbrella review*

| First Author Last Name | Publication Year | First Author Country | Title                                                                                                                                                       | Aim                                                                                                                                                                                                                                                                    | Countries of studies analyzed within included reviews                                                                                                                                                                 | Population Focus        | Health Services Focus        | Outcomes Relevant to PROGRESS-Plus                                                                      | Funding Source Reported |
|------------------------|------------------|----------------------|-------------------------------------------------------------------------------------------------------------------------------------------------------------|------------------------------------------------------------------------------------------------------------------------------------------------------------------------------------------------------------------------------------------------------------------------|-----------------------------------------------------------------------------------------------------------------------------------------------------------------------------------------------------------------------|-------------------------|------------------------------|---------------------------------------------------------------------------------------------------------|-------------------------|
|                        |                  |                      |                                                                                                                                                             | pregnant or postpartum women.                                                                                                                                                                                                                                          | Pakistan, Republic of Vanuatu, Tajikistan, Thailand, Uganda, Vietnam                                                                                                                                                  |                         |                              |                                                                                                         |                         |
| McCollum               | 2016             | UK                   | How equitable are community health worker programmes and which programme features influence equity of community health worker services? A systematic review | To determine the extent of equity of community health worker programmes and to identify intervention designs which influence equity of health outcomes.                                                                                                                | Brazil, Bangladesh, Philippines, Malawi, Kenya, Pakistan, Guatemala, Zambia, Cambodia, Uganda, South Africa, Nigeria, Haiti, Nepal, Tanzania,                                                                         | General                 | Lay/Community Health Workers | Place of Residence, Socioeconomic Status, Social Capital, Education, Race, Ethnicity, Culture, Language | Yes                     |
| Lassi                  | 2016             | Australia            | Strategies for improving health care seeking for maternal and newborn illnesses in low- and middle-income countries: a systematic review and meta-analysis  | To assess the impact of different strategies to improve maternal and neonatal health care seeking in low- and middle- income countries for pregnant women at any gestation, postpartum women up to 6 weeks after giving birth, and neonates less than 28 days of life. | India, Bangladesh, Vietnam, Malawi, Ghana, South Africa, Tanzania, Pakistan, China, Zambia, Nigeria, Syria, Uganda, Nepal, Gambia, Eritrea, Indonesia, Burkino Faso, Brazil, Guatemala, Thailand, Bolivia, Argentina, | Maternal & Child Health | General                      | Place of Residence, Social Capital, Education                                                           | Yes                     |

*Equity in prenatal healthcare services globally: An umbrella review*

| First Author Last Name | Publication Year | First Author Country | Title                                                                                                                                  | Aim                                                                                                                                                                                                 | Countries of studies analyzed within included reviews                                                                                                                                    | Population Focus | Health Services Focus      | Outcomes Relevant to PROGRESS-Plus                                  | Funding Source Reported |
|------------------------|------------------|----------------------|----------------------------------------------------------------------------------------------------------------------------------------|-----------------------------------------------------------------------------------------------------------------------------------------------------------------------------------------------------|------------------------------------------------------------------------------------------------------------------------------------------------------------------------------------------|------------------|----------------------------|---------------------------------------------------------------------|-------------------------|
|                        |                  |                      |                                                                                                                                        |                                                                                                                                                                                                     | Congo DR, Turkey,                                                                                                                                                                        |                  |                            |                                                                     |                         |
| Wekesah                | 2016             | Kenya                | Effective non-drug interventions for improving outcomes and quality of maternal health care in sub-Saharan Africa: a systematic review | To explore non-drug interventions and their effectiveness to improve outcomes and impact on the quality of maternal health care in Sub-Saharan Africa for pregnant and postpartum women.            | Rwanda, Tanzania, Nigeria, South Africa, Ghana, Kenya, Mali, Burkina Faso, Nairobi, Senegal, Burundi, Uganda, Malawi, Angola, Somali, Ethiopia, Mozambique, Zambia, Benin, Côte d'Ivoire | Perinatal        | General                    | Place of Residence, Socioeconomic Status, Social Capital, Education | Yes                     |
| Ahmed                  | 2017             | Canada               | A mixed methods systematic review of success factors of mhealth and telehealth for maternal health in Sub-Saharan Africa               | To provide a knowledge synthesis regarding success factors of introduction and use of telehealth and mhealth for maternal health in Sub-Saharan Africa for women of childbearing age (15-50 years). | Ethiopia, Rwanda, Ghana, Liberia, South Africa, Kenya,                                                                                                                                   | Maternal Health  | Digital/Mhealth/Telehealth | Race, Ethnicity, Culture, Language, Social Capital                  | Not Reported            |

*Equity in prenatal healthcare services globally: An umbrella review*

| <b>First Author Last Name</b> | <b>Publication Year</b> | <b>First Author Country</b> | <b>Title</b>                                                                                                                                              | <b>Aim</b>                                                                                                                                                                                                                                                                                                                | <b>Countries of studies analyzed within included reviews</b>                                                                                                     | <b>Population Focus</b> | <b>Health Services Focus</b> | <b>Outcomes Relevant to PROGRESS-Plus</b>                                                | <b>Funding Source Reported</b> |
|-------------------------------|-------------------------|-----------------------------|-----------------------------------------------------------------------------------------------------------------------------------------------------------|---------------------------------------------------------------------------------------------------------------------------------------------------------------------------------------------------------------------------------------------------------------------------------------------------------------------------|------------------------------------------------------------------------------------------------------------------------------------------------------------------|-------------------------|------------------------------|------------------------------------------------------------------------------------------|--------------------------------|
| Hunter b                      | 2017                    | UK                          | Demand-side financing for maternal and newborn health: what do we know about factors that affect implementation of cash transfers and voucher programmes? | To document experiences and implementation factors associated with use of demand-side financing to promote uptake of maternity care services and maternal and newborn health, and wider impact on quality of care for women who were pregnant or within 42 days of end of pregnancy, in low- and middle-income countries. | Mexico, Indonesia, Brazil, Salvador, India, Uruguay, Guatemala, Honduras, Zambia, Nigeria, China, Nepal, Pakistan, Bangladesh, Uganda, Kenya, Cambodia, Tanzania | Perinatal               | Demand Side Financing        | Place of Residence, Socioeconomic Status, Race, Ethnicity, Culture, Language, Gender/Sex | Yes                            |
| Mutambudzi                    | 2017                    | USA                         | A review of recent literature on materialist and psychosocial models for racial and ethnic disparities in birth outcomes in the US, 2000–2014             | To explore the implications of materialistic and psychosocial models in racial and ethnic disparities of birth outcomes, and for reforming both the work environment and the cycle of poverty for singleton, pregnant women, black women and other racial ethnic groups in the United States.                             | USA                                                                                                                                                              | Prenatal only           | General                      | Race, Ethnicity, Culture, Language, Socioeconomic Status                                 | Not Reported                   |

*Equity in prenatal healthcare services globally: An umbrella review*

| First Author Last Name | Publication Year | First Author Country | Title                                                                                                             | Aim                                                                                                                                                                                                                                                   | Countries of studies analyzed within included reviews                                                                                                                                                                                                                                | Population Focus | Health Services Focus | Outcomes Relevant to PROGRESS-Plus                                                          | Funding Source Reported |
|------------------------|------------------|----------------------|-------------------------------------------------------------------------------------------------------------------|-------------------------------------------------------------------------------------------------------------------------------------------------------------------------------------------------------------------------------------------------------|--------------------------------------------------------------------------------------------------------------------------------------------------------------------------------------------------------------------------------------------------------------------------------------|------------------|-----------------------|---------------------------------------------------------------------------------------------|-------------------------|
| Kyei-Nimakoh           | 2017             | Australia            | Access barriers to obstetric care at health facilities in sub-Saharan Africa—a systematic review                  | To synthesize current evidence on barriers to obstetric care at health institutions in Sub-Saharan Africa for females in their reproductive age, pregnant and postnatal women.                                                                        | Nigeria, Ethiopia, Uganda, Nigeria, Zimbabwe, Burkina Faso, Tanzania, Sierra Leone, Rwanda, rural Malawi, Kenya, Ghana, Zambia, South Africa, Cameroon, Mali, Democratic Republic of Congo, Mozambique, Burundi and Northern Uganda, Senegal, Congo, Benin, Gambia, Angola, Liberia, | Perinatal        | General               | Race, Ethnicity, Culture, Language, Religion, Education, Social Capital, Place of Residence | Yes                     |
| Hunter a               | 2017             | UK                   | The effects of cash transfers and vouchers on the use and quality of maternity care services: A systematic review | To assess the effect and cost-effectiveness of different demand-side financing interventions on maternity care service utilisation and maternal and newborn health outcomes in low- and middle-income countries for women who were pregnant or within | Pakistan, Bangladesh, Indonesia, Uganda, Uruguay, Kenya, india, Mexico, El Salvador, Brazil, Guatemala, Zambia, Tanzania, China, Honduras, Tanzania,                                                                                                                                 | Perinatal        | Demand Side Financing | Socioeconomic Status                                                                        | Yes                     |



*Equity in prenatal healthcare services globally: An umbrella review*

| First Author Last Name | Publication Year | First Author Country | Title                                                                                                                                                                                                       | Aim                                                                                                                                          | Countries of studies analyzed within included reviews                                                                                                                                                                                                                                                                     | Population Focus | Health Services Focus | Outcomes Relevant to PROGRESS-Plus | Funding Source Reported |
|------------------------|------------------|----------------------|-------------------------------------------------------------------------------------------------------------------------------------------------------------------------------------------------------------|----------------------------------------------------------------------------------------------------------------------------------------------|---------------------------------------------------------------------------------------------------------------------------------------------------------------------------------------------------------------------------------------------------------------------------------------------------------------------------|------------------|-----------------------|------------------------------------|-------------------------|
|                        |                  |                      |                                                                                                                                                                                                             | 42 days of giving birth.                                                                                                                     | Nigeria, Nepal, Cambodia                                                                                                                                                                                                                                                                                                  |                  |                       |                                    |                         |
| Cormick                | 2018             | Argentina            | Global inequities in dietary calcium intake during pregnancy: a systematic review and meta-analysis and relevant stakeholders, through the following objectives: investigate the experience of provision of | To assess calcium intake anytime during pregnancy for pregnant women of any age, ethnic group, parity, education, and socio-economic status. | Australia, Belgium, Canada, Croatia, Greece, Ireland, Israel, Japan, Netherlands, New Zealand, Norway, Poland, Portugal, Saudi Arabia, South Korea, Spain, Taiwan, UK, USA, Argentina, Brazil, China, Colombia, Egypt, Ethiopia, India, Jordan, Kenya, Malaysia, Morocco, Nepal, Pakistan, South Africa, Thailand, Turkey | Prenatal only    | Nutrition             | Socioeconomic Status               | Yes                     |

*Equity in prenatal healthcare services globally: An umbrella review*

| <b>First Author Last Name</b> | <b>Publication Year</b> | <b>First Author Country</b> | <b>Title</b>                                                                                                                                                                             | <b>Aim</b>                                                                                                                                                                          | <b>Countries of studies analyzed within included reviews</b>                                     | <b>Population Focus</b> | <b>Health Services Focus</b>  | <b>Outcomes Relevant to PROGRESS-Plus</b>                          | <b>Funding Source Reported</b> |
|-------------------------------|-------------------------|-----------------------------|------------------------------------------------------------------------------------------------------------------------------------------------------------------------------------------|-------------------------------------------------------------------------------------------------------------------------------------------------------------------------------------|--------------------------------------------------------------------------------------------------|-------------------------|-------------------------------|--------------------------------------------------------------------|--------------------------------|
| Tokhi                         | 2018                    | Australia                   | Involving men to improve maternal and newborn health: A systematic review of the effectiveness of interventions                                                                          | To determine the effect of interventions to engage men during pregnancy, childbirth and infancy and their influence on mortality and morbidity in low- and middle-income countries. | South Africa, Pakistan, Nepal, Turkey, India, Bangladesh, Tanzania, Indonesia, Eritrea           | Maternal & Child Health | Engaging Men During Pregnancy | Social Capital, Education                                          | Yes                            |
| Magwood                       | 2018                    | Canada                      | Understanding women's, caregivers', and providers' experiences with home-based records: A systematic review of qualitative studies                                                       | To explore the feasibility, acceptability, affordability and equity of home-based records for maternal, newborn and child health in low-, middle-, and high-income settings.        | USA, New Zealand, Brazil, Palestine, Australia, South Africa, Scotland, England, Canada, Cambodi | Maternal & Child Health | Home-based Records            | Education                                                          | Yes                            |
| Blanchard                     | 2019                    | UK                          | Effects of community health worker interventions on socioeconomic inequities in maternal and newborn health in low-income and middle-income countries: a mixed-methods systematic review | To explore the effects of community health worker interventions on equity in maternal and newborn health in low- middle-income countries.                                           | India, Malawi, Bangladesh, Nepal, Vietnam, Brazil                                                | Maternal & Child Health | Lay/Community Health Workers  | Socioeconomic Status, Social Capital, Place of Residence, Religion | Yes                            |

*Equity in prenatal healthcare services globally: An umbrella review*

| <b>First Author Last Name</b> | <b>Publication Year</b> | <b>First Author Country</b> | <b>Title</b>                                                                                                                                                                      | <b>Aim</b>                                                                                                                                                                               | <b>Countries of studies analyzed within included reviews</b>                     | <b>Population Focus</b> | <b>Health Services Focus</b> | <b>Outcomes Relevant to PROGRESS-Plus</b>                                                    | <b>Funding Source Reported</b> |
|-------------------------------|-------------------------|-----------------------------|-----------------------------------------------------------------------------------------------------------------------------------------------------------------------------------|------------------------------------------------------------------------------------------------------------------------------------------------------------------------------------------|----------------------------------------------------------------------------------|-------------------------|------------------------------|----------------------------------------------------------------------------------------------|--------------------------------|
| Walker                        | 2019                    | New Zealand                 | Understanding the experiences, perspectives and values of indigenous women around smoking cessation in pregnancy: systematic review and thematic synthesis of qualitative studies | To describe indigenous women's experiences, perceptions, and values related to stopping smoking in pregnancy.                                                                            | New Zealand, Australia                                                           | Prenatal only           | Smoking Cessation            | Race, Ethnicity, Culture, Language, Social Capital, Place of Residence, Socioeconomic Status | No Funding                     |
| Higgenbottom                  | 2019                    | UK                          | Experience of and access to maternity care in the UK by immigrant women: a narrative synthesis systematic review                                                                  | To explore interventions that focus specifically on improving maternity care for immigrant women in the United Kingdom and how they address inequality, accessibility and acceptability. | UK                                                                               | Perinatal               | General                      | Race, Ethnicity, Culture, Language, Socioeconomic Status, Place of Residence, Religion       | Yes                            |
| Magwood                       | 2019                    | Canada                      | Effectiveness of home-based records on maternal, newborn and child health outcomes: A systematic review and meta-analysis                                                         | To synthesize and compare the evidence of the health and cost effectiveness of home based records for improving maternal, newborn and child health out-comes.                            | Norway, England, Australia, Mongolia, Indonesia, Canada, USA, Pakistan, Cambodia | Maternal & Child Health | Home-based Records           | Education                                                                                    | Yes                            |

*Equity in prenatal healthcare services globally: An umbrella review*

| <b>First Author Last Name</b> | <b>Publication Year</b> | <b>First Author Country</b> | <b>Title</b>                                                                                                                                                                                                      | <b>Aim</b>                                                                                                                                                                              | <b>Countries of studies analyzed within included reviews</b>                                                                     | <b>Population Focus</b> | <b>Health Services Focus</b> | <b>Outcomes Relevant to PROGRESS-Plus</b>                           | <b>Funding Source Reported</b> |
|-------------------------------|-------------------------|-----------------------------|-------------------------------------------------------------------------------------------------------------------------------------------------------------------------------------------------------------------|-----------------------------------------------------------------------------------------------------------------------------------------------------------------------------------------|----------------------------------------------------------------------------------------------------------------------------------|-------------------------|------------------------------|---------------------------------------------------------------------|--------------------------------|
| Banke-Thomas                  | 2019                    | UK                          | Assessing geographical distribution and accessibility of emergency obstetric care in sub-Saharan Africa: a systematic review                                                                                      | To explore studies that assessed emergency obstetric care geographical distribution and accessibility in Sub-Saharan Africa for women during pregnancy and childbirth.                  | Malawi, Ethiopia, Zambia, Sierra Leone, Ghana, Rwanda, Kenya, Burkina Faso, Guinea, Tanzania                                     | Perinatal               | Emergency Obstetric Care     | Place of Residence                                                  | No Funding                     |
| Ames                          | 2019                    | Norway                      | Clients' perceptions and experiences of targeted digital communication accessible via mobile devices for reproductive, maternal, newborn, child, and adolescent health: a qualitative evidence synthesis (Review) | To explore clients' perceptions and experiences of targeted digital communication via mobile devices on topics related to reproductive, maternal, newborn, child, or adolescent health. | Nigeria, USA, Peru, Ghana, UK, Australia, Lesotho, Sierra Leone, Kenya, South Africa, Cameroon, India, Canada, Uganda, Cambodia, | Maternal & Child Health | Digital/Mhealth/Telehealth   | Education, Socioeconomic Status, Race, Ethnicity, Culture, Language | Yes                            |
| Bovill                        | 2019                    | Australia                   | Ngu-ng-gi-lan-nha (to exchange) knowledge. How is Aboriginal and Torres Strait Islander people's empowerment being upheld and reported in                                                                         | To provide an overview of smoking cessation interventions offered to Aboriginal women during the pregnancy or postnatal period and describe the evidence of individual and              | Australia                                                                                                                        | Perinatal               | Smoking Cessation            | Social Capital, Education                                           | Yes                            |

*Equity in prenatal healthcare services globally: An umbrella review*

| First Author Last Name | Publication Year | First Author Country | Title                                                                                                                              | Aim                                                                                                                                                                   | Countries of studies analyzed within included reviews                                                 | Population Focus | Health Services Focus       | Outcomes Relevant to PROGRESS-Plus             | Funding Source Reported |
|------------------------|------------------|----------------------|------------------------------------------------------------------------------------------------------------------------------------|-----------------------------------------------------------------------------------------------------------------------------------------------------------------------|-------------------------------------------------------------------------------------------------------|------------------|-----------------------------|------------------------------------------------|-------------------------|
|                        |                  |                      | smoking cessation interventions during pregnancy: a systematic review                                                              | community empowerment in Australia.                                                                                                                                   |                                                                                                       |                  |                             |                                                |                         |
| Watson                 | 2019             | UK                   | A systematic review of ethnic minority women's experiences of perinatal mental health conditions and services in Europe            | To explore the experiences and perceptions of perinatal mental health and help-seeking behaviours for mental health services amongst ethnic minority women in Europe. | UK                                                                                                    | Perinatal        | Mental Health               | Race, Ethnicity, Culture, Language, Gender/Sex | Yes                     |
| Vanstone               | 2019             | Canada               | Perspectives of Pregnant People and Clinicians on Noninvasive Prenatal Testing: A systematic Review and Qualitative Meta-synthesis | To describe belief preferences, and perspectives of pregnant people, their families, clinicians, and others who have experience with noninvasive prenatal testing.    | US, UK, Netherlands, Canada, China, Finaldn, Israel, New Zealand                                      | Prenatal only    | Prenatal Testing/ Screening | Socioeconomic Status                           | Yes                     |
| Sanogo                 | 2019             | Canada               | Universal Health Coverage and Facilitation of Equitable Access to Care in Africa                                                   | To examine the effects of universal health coverage on equitable access to care in Africa for vulnerable and underprivileged populations.                             | Ghana, Brazil, Mexico, Thailand, Malawi, Madagascar, Burkina Faso, Rwanda, Bangladesh, Vietnam, Kenya | General          | Universal Health Coverage   | Socioeconomic Status                           | Not Reported            |

*Equity in prenatal healthcare services globally: An umbrella review*

| <b>First Author Last Name</b> | <b>Publication Year</b> | <b>First Author Country</b> | <b>Title</b>                                                                                                       | <b>Aim</b>                                                                                                                                                                                                                              | <b>Countries of studies analyzed within included reviews</b>                                                                    | <b>Population Focus</b> | <b>Health Services Focus</b> | <b>Outcomes Relevant to PROGRESS-Plus</b>                                      | <b>Funding Source Reported</b> |
|-------------------------------|-------------------------|-----------------------------|--------------------------------------------------------------------------------------------------------------------|-----------------------------------------------------------------------------------------------------------------------------------------------------------------------------------------------------------------------------------------|---------------------------------------------------------------------------------------------------------------------------------|-------------------------|------------------------------|--------------------------------------------------------------------------------|--------------------------------|
| Fair                          | 2020                    | UK                          | Migrant women's experiences of pregnancy, childbirth and maternity care in European countries: A systematic review | To provide evidence on migrant women's experiences of pregnancy, childbirth and maternity care in their destination country within Europe for women described as migrants, refugees or asylum seekers, including undocumented migrants. | Portugal, UK, Spain, Switzerland, Sweden, Finland, Ireland, Norway, Netherlands, Greece, Germany, France, Italy, Czech Republic | Perinatal               | General                      | Race, Ethnicity, Culture, Language, Socioeconomic Status, Occupation, Religion | Yes                            |
| Firdous                       | 2020                    | UK                          | Muslim women's experiences of maternity services in the UK: qualitative systematic review and thematic synthesis   | To identify and synthesize evidence of Muslim women's experiences of maternity services in the United Kingdom.                                                                                                                          | United Kingdom                                                                                                                  | Perinatal               | General                      | Religion, Race, Ethnicity, Culture, Language                                   | Yes                            |
| Palmer                        | 2020                    | UK                          | Targeted client communication via mobile devices for improving maternal, neonatal, and child health                | To assess the effects of targeted client communication via mobile devices on health behaviour, service use, health, and well-being for maternal, newborn, and child health.                                                             | USA, Thailand, India, Kenya, Tanzania, Ecuador, England, Nigeria, Canada, Zimbabwe, Cameroon, Guatemala, Hawaii, India          | Maternal & Child Health | Digital/Mhealth/Telehealth   | Place of Residence, Social Capital                                             | Yes                            |

*Equity in prenatal healthcare services globally: An umbrella review*

| First Author Last Name | Publication Year | First Author Country | Title                                                                                                                                                               | Aim                                                                                                                                                                                                                                                                                                    | Countries of studies analyzed within included reviews                                                                            | Population Focus | Health Services Focus       | Outcomes Relevant to PROGRESS-Plus                                                                       | Funding Source Reported |
|------------------------|------------------|----------------------|---------------------------------------------------------------------------------------------------------------------------------------------------------------------|--------------------------------------------------------------------------------------------------------------------------------------------------------------------------------------------------------------------------------------------------------------------------------------------------------|----------------------------------------------------------------------------------------------------------------------------------|------------------|-----------------------------|----------------------------------------------------------------------------------------------------------|-------------------------|
| Dahab                  | 2020             | UK                   | Barriers to Accessing Maternal Care in Low Income Countries in Africa: A Systematic Review                                                                          | To investigate the experience of provision of maternal care services and facilities in low-income countries in Africa and explore the different barriers to accessing maternal care reported by women and relevant stakeholders during pregnancy, delivery, and the immediate period after childbirth. | South Sudan, Ethiopia, Mali, Togo, Mozambique, Malawi, Tanzania, Zimbabwe                                                        | Perinatal        | General                     | Socioeconomic Status, Place of Residence, Race, Ethnicity, Culture, Language, Occupation, Social Capital | No Funding              |
| Ogundele               | 2020             | Netherlands          | Socioeconomic inequalities in reproductive health care services across Sub-Saharan Africa. A systematic review and meta-analysis<br>Author links open overlay panel | To analyze evidence on socioeconomic inequalities in reproductive health care utilization in Sub-Saharan Africa for women of reproductive age                                                                                                                                                          | Ghana, Nigeria, South Africa, Cameroon, Ethiopia, Ghana, Kenya, Nigeria, Uganda, Zambia, Zimbabwe, Malawi, Burkina Faso, Namibia | Perinatal        | General                     | Socioeconomic Status                                                                                     | Not Reported            |
| Beatson                | 2020             | Australia            | Systematic review: An exploration of core componentry characterizing effective sustained nurse                                                                      | To explore program components aspects that nursing home visiting programs have in common and the program content which                                                                                                                                                                                 | United Kingdom, Australia, USA, Germany, Netherlands                                                                             | Perinatal        | Nursing Home Visit Programs | Education, Place of Residence, Social Capital                                                            | Yes                     |

*Equity in prenatal healthcare services globally: An umbrella review*

| First Author Last Name | Publication Year | First Author Country | Title                                                                                                                                               | Aim                                                                                                                                                       | Countries of studies analyzed within included reviews                      | Population Focus | Health Services Focus       | Outcomes Relevant to PROGRESS-Plus                                     | Funding Source Reported |
|------------------------|------------------|----------------------|-----------------------------------------------------------------------------------------------------------------------------------------------------|-----------------------------------------------------------------------------------------------------------------------------------------------------------|----------------------------------------------------------------------------|------------------|-----------------------------|------------------------------------------------------------------------|-------------------------|
|                        |                  |                      | home visiting programs                                                                                                                              | accounts for their effectiveness on relevant outcomes for pregnant women, disadvantaged mothers, during pregnancy or prior to the child's first birthday. |                                                                            |                  |                             |                                                                        |                         |
| Chando                 | 2021             | Australia            | Stakeholder perspectives on the implementation and impact of Indigenous health interventions: A systematic review of qualitative studies            | To describe perspectives and experiences with the implementation and impact of complex health interventions for Indigenous communities.                   | United States, Canada, Australia, New Zealand                              | General          | General                     | Race, Ethnicity, Culture, Language, Place of Residence, Social Capital | Yes                     |
| Mengist                | 2021             | Ethiopia             | Maternal near miss in Ethiopia: Protective role of antenatal care and disparity in socioeconomic inequities: A systematic review and meta-analysis. | To estimate the national burden of maternal near-miss and contributing factors in Ethiopia for women who were pregnant, in childbirth, or postpartum.     | Ethiopia                                                                   | Perinatal        | General                     | Place of Residence, Education, Social Capital                          | No Funding              |
| Moncrieff              | 2021             | UK                   | First and second trimester ultrasound in pregnancy: A systematic review and                                                                         | To examine what views, beliefs, concerns and experiences have been reported in relation to routine                                                        | Sweden, UK, Canada, Denmark, USA, Brazil, Norway, Tanzania, Greece, Kenya, | Prenatal only    | Prenatal Testing/ Screening | Socioeconomic Status, Place of Residence                               | Yes                     |



*Equity in prenatal healthcare services globally: An umbrella review*

| First Author Last Name | Publication Year | First Author Country | Title                                                                                                                                                                    | Aim                                                                                                                                                                   | Countries of studies analyzed within included reviews                                     | Population Focus        | Health Services Focus | Outcomes Relevant to PROGRESS-Plus                                       | Funding Source Reported |
|------------------------|------------------|----------------------|--------------------------------------------------------------------------------------------------------------------------------------------------------------------------|-----------------------------------------------------------------------------------------------------------------------------------------------------------------------|-------------------------------------------------------------------------------------------|-------------------------|-----------------------|--------------------------------------------------------------------------|-------------------------|
|                        |                  |                      | metasynthesis of the views and experiences of pregnant women, partners, and health workers                                                                               | antenatal ultrasound examination in pregnancy and what are the influencing factors associated with appropriate or inappropriate use of routine antenatal ultrasounds? | Australia, Vietnam, Holland, India, Israel, New Zealand, Iceland, Uganda, Netherlands     |                         |                       |                                                                          |                         |
| Lyall                  | 2021             | Australia            | “The Problem Is that We Hear a Bit of Everything . . . ”: A Qualitative Systematic Review of Factors Associated with Alcohol Use, Reduction, and Abstinence in Pregnancy | To understand the complexities of women’s alcohol use, reduction, or abstinence during pregnancy for pregnant and recently postpartum women.                          | Australia, USA, UK, South Africa, Switzerland, Brazil, France, India, Netherlands, Sweden | Perinatal               | Alcohol Abstinence    |                                                                          | Yes                     |
| Jhaveri                | 2021             | USA                  | Responsible Inclusion of Pregnant Individuals in Eradicating HCV                                                                                                         | To assess data on hepatitis C virus treatment in pregnancy and analyze ethical considerations for the responsible inclusion of pregnant individuals.                  | N/R                                                                                       | Prenatal only           | Hepatitis C Treatment | Socioeconomic Status                                                     | Yes                     |
| Sidze                  | 2021             | Kenya                | Inequalities in Access and Utilization of Maternal, Newborn and Child Health Services in sub-                                                                            | To explore the state of inequalities in access to and utilization of maternal, newborn and child health services in the sub-                                          | Kenya, Uganda, Ethiopia, Nigeria, Malawi, Tanzania, Zambia, Ghana,                        | Maternal & Child Health | General               | Race, Ethnicity, Culture, Language, Socioeconomic Status, Social Capital | Not Reported            |

*Equity in prenatal healthcare services globally: An umbrella review*

| First Author Last Name | Publication Year | First Author Country | Title                                                                                                                                                     | Aim                                                                                                                                                                    | Countries of studies analyzed within included reviews                                                                              | Population Focus | Health Services Focus | Outcomes Relevant to PROGRESS-Plus                                             | Funding Source Reported |
|------------------------|------------------|----------------------|-----------------------------------------------------------------------------------------------------------------------------------------------------------|------------------------------------------------------------------------------------------------------------------------------------------------------------------------|------------------------------------------------------------------------------------------------------------------------------------|------------------|-----------------------|--------------------------------------------------------------------------------|-------------------------|
|                        |                  |                      | Saharan Africa: A Special Focus on Urban Settings                                                                                                         | Saharan African region.                                                                                                                                                | Burkina Faso, South Sudan                                                                                                          |                  |                       |                                                                                |                         |
| Prady                  | 2021             | UK                   | Inequalities in the identification and management of common mental disorders in the perinatal period: An equity focused reanalysis of a systematic review | To explore the equity in the implementation of guidance related to identification and management for mental health problems in the United Kingdom for perinatal women. | United Kingdom                                                                                                                     | Perinatal        | Mental Health         | Race, Ethnicity, Culture, Language, Socioeconomic Status, Gender/Sex, Plus-Age | Yes                     |
| Toh                    | 2022             | Singapore            | Experiences and needs of women from ethnic minorities in maternity healthcare: A qualitative systematic review and meta-aggregation                       | To consolidate the available evidence around ethnic minority women's experiences and needs when accessing maternity care.                                              | UK, USA, Ireland, Vietnam, London, New Zealand, Netherlands, England, Balkans, Belgium, Iran, Scotland, Australia, Israel, Alberta | Perinatal        | General               | Race, Ethnicity, Culture, Language, Gender/Sex                                 | Yes                     |
| Kirubarajan            | 2022             | Canada               | LGBTQ2S+ childbearing individuals and perinatal mental health: A systematic review                                                                        | To characterize and synthesize the experiences of LGBTQ2S+ child-bearing individuals regarding perinatal mental health.                                                | Canada, USA, Netherlands, Sweden, Australia,                                                                                       | Perinatal        | Mental Health         | Gender/Sex, Race, Ethnicity, Culture, Language, Social Capital, Socioeconomic  | No Funding              |

*Equity in prenatal healthcare services globally: An umbrella review*

| <b>First Author Last Name</b> | <b>Publication Year</b> | <b>First Author Country</b> | <b>Title</b> | <b>Aim</b> | <b>Countries of studies analyzed within included reviews</b> | <b>Population Focus</b> | <b>Health Services Focus</b> | <b>Outcomes Relevant to PROGRESS-Plus</b> | <b>Funding Source Reported</b> |
|-------------------------------|-------------------------|-----------------------------|--------------|------------|--------------------------------------------------------------|-------------------------|------------------------------|-------------------------------------------|--------------------------------|
|                               |                         |                             |              |            |                                                              |                         |                              | Status, Place of Residence                |                                |

*N/R=study did not report this data*
