# Supplementary material for: Equity in prenatal healthcare services globally: an umbrella review
Source: Springer Nature journal article supplement (doi:10.1186/s12884-024-06388-0), 2024-03-11
Supplement: MOESM2 [file 26840516]

## **Search Strategy**

### CINAHL Plus (EBSCO):

TX (prenatal\* OR pre natal\* OR antenatal\* OR ante natal\* OR prepartum OR pre partum OR perinatal\* OR peri natal\* OR peripartum OR peri partum OR pregnan\* OR gestation\*)

AND

TX (equit\* OR inequit\*)

AND

TX (systematic review\* OR meta-analys\*) OR PT (systematic review\* OR meta-analys\*)

### Medline (OVID):

(prenatal\* OR pre natal\* OR antenatal\* OR ante natal\* OR prepartum OR pre partum OR perinatal\* OR peri natal\* OR peripartum OR peri partum OR pregnan\* OR gestation\*).mp. and (equit\* or inequit\*).mp. and ((systematic review\* or meta-analys\*).pt. or (systematic review\* or meta-analys\*).mp.)

### EMBASE (OVID):

(prenatal\* OR pre natal\* OR antenatal\* OR ante natal\* OR prepartum OR pre partum OR perinatal\* OR peri natal\* OR peripartum OR peri partum OR pregnan\* OR gestation\*).mp. and (equit\* or inequit\*).mp. and ((systematic review\* or meta-analys\*).pt. or (systematic review\* or meta-analys\*).mp.)

### APA PsycInfo (OVID):

(prenatal\* OR pre natal\* OR antenatal\* OR ante natal\* OR prepartum OR pre partum OR perinatal\* OR peri natal\* OR peripartum OR peri partum OR pregnan\* OR gestation\*).mp. and (equit\* or inequit\*).mp. and ((systematic review\* or meta-analys\*).pt. or (systematic review\* or meta-analys\*).mp.)

### IBSS (ProQuest):

(prenatal\* OR pre-natal\* OR antenatal\* OR ante-natal\* OR prepartum OR pre-partum OR perinatal\* OR peri-natal\* OR peripartum OR peri-partum OR pregnan\* OR gestation\*)

AND

(equit\* OR inequit\*)

AND

(systematic review\* OR meta-analys\*)

### Cochrane:

(prenatal\* OR pre natal\* OR antenatal\* OR ante natal\* OR prepartum OR pre partum OR perinatal\* OR peri natal\* OR peripartum OR peri partum OR pregnan\* OR gestation\*):ti,ab,kw and (equit\* or inequit\*):ti,ab,kw and (systematic review\* or meta-analys\*):ti,ab,kw
