# Supplementary material for: Equity in prenatal healthcare services globally: an umbrella review
Source: Springer Nature journal article supplement (doi:10.1186/s12884-024-06388-0), 2024-03-11
Supplement: MOESM3 [file 26840516]

**ROBIS Quality Appraisal of Included Studies**

|                                   |                             | <b>D1:<br/>Eligibility<br/>Criteria</b>                                                             | <b>D2:<br/>Identification &amp;<br/>Selection</b>                                                   | <b>D3: Data<br/>Collection &amp;<br/>Appraisal</b>                                                  | <b>D4: Synthesis &amp;<br/>Findings</b>                                                                   | <b>Risk of Bias in<br/>Overall<br/>Review</b>                                                 |
|-----------------------------------|-----------------------------|-----------------------------------------------------------------------------------------------------|-----------------------------------------------------------------------------------------------------|-----------------------------------------------------------------------------------------------------|-----------------------------------------------------------------------------------------------------------|-----------------------------------------------------------------------------------------------|
| <b>First Author<br/>Last Name</b> | <b>Publication<br/>Year</b> | <u>Risk of Bias:</u><br>Low = 4 and 5<br>Moderate: = 3<br>High: 0 to 2<br><br><i>Total Score: 5</i> | <u>Risk of Bias:</u><br>Low = 4 and 5<br>Moderate: = 3<br>High: 0 to 2<br><br><i>Total Score: 5</i> | <u>Risk of Bias:</u><br>Low = 4 and 5<br>Moderate: = 3<br>High: 0 to 2<br><br><i>Total Score: 5</i> | <u>Risk of Bias:</u><br>Low = 5 and 6<br>Moderate: = 3 and 4<br>High: 0 to 2<br><br><i>Total Score: 6</i> | <u>Risk of Bias:</u><br>Low = 3<br>Moderate: = 2<br>High: 0 to 1<br><br><i>Total Score: 3</i> |
| Ahmed                             | 2017                        | 5                                                                                                   | 5                                                                                                   | 5                                                                                                   | 4                                                                                                         | 2                                                                                             |
| Ames                              | 2019                        | 5                                                                                                   | 5                                                                                                   | 5                                                                                                   | 5                                                                                                         | 2                                                                                             |
| Balaam                            | 2013                        | 3                                                                                                   | 4                                                                                                   | 4                                                                                                   | 3                                                                                                         | 2                                                                                             |
| Banke-Thomas                      | 2020                        | 5                                                                                                   | 5                                                                                                   | 2                                                                                                   | 4                                                                                                         | 3                                                                                             |
| Beatson                           | 2014                        | 5                                                                                                   | 5                                                                                                   | 3                                                                                                   | 6                                                                                                         | 3                                                                                             |
| Benova                            | 2021                        | 3                                                                                                   | 3                                                                                                   | 3                                                                                                   | 5                                                                                                         | 2                                                                                             |
| Blanchard                         | 2019                        | 5                                                                                                   | 4                                                                                                   | 3                                                                                                   | 5                                                                                                         | 2                                                                                             |
| Bovill                            | 2019                        | 5                                                                                                   | 5                                                                                                   | 4                                                                                                   | 6                                                                                                         | 2                                                                                             |
| Byrne                             | 2013                        | 4                                                                                                   | 5                                                                                                   | 3                                                                                                   | 6                                                                                                         | 2                                                                                             |
| Byrne                             | 2014                        | 5                                                                                                   | 4                                                                                                   | 5                                                                                                   | 6                                                                                                         | 2                                                                                             |
| Caliskan                          | 2015                        | 2                                                                                                   | 5                                                                                                   | 3                                                                                                   | 4                                                                                                         | 2                                                                                             |
| Chamberlain                       | 2013                        | 5                                                                                                   | 5                                                                                                   | 5                                                                                                   | 6                                                                                                         | 3                                                                                             |
| Chando                            | 2021                        | 4                                                                                                   | 5                                                                                                   | 3                                                                                                   | 5                                                                                                         | 2                                                                                             |
| Cormick                           | 2018                        | 5                                                                                                   | 5                                                                                                   | 5                                                                                                   | 5                                                                                                         | 2                                                                                             |
| Dahab                             | 2020                        | 5                                                                                                   | 3                                                                                                   | 4                                                                                                   | 6                                                                                                         | 3                                                                                             |
| Darmstadt                         | 2009                        | 5                                                                                                   | 4                                                                                                   | 3                                                                                                   | 4                                                                                                         | 2                                                                                             |
| DeMaio                            | 2010                        | 4                                                                                                   | 4                                                                                                   | 2                                                                                                   | 4                                                                                                         | 2                                                                                             |
| Ehiri                             | 2014                        | 4                                                                                                   | 5                                                                                                   | 5                                                                                                   | 5                                                                                                         | 3                                                                                             |
| Fair                              | 2020                        | 4                                                                                                   | 5                                                                                                   | 4                                                                                                   | 3                                                                                                         | 2                                                                                             |
| Feijen-de Jong                    | 2011                        | 4                                                                                                   | 3                                                                                                   | 3                                                                                                   | 5                                                                                                         | 2                                                                                             |

*Equity in prenatal healthcare services globally: An umbrella review*

|              |      |   |   |   |   |   |
|--------------|------|---|---|---|---|---|
| Firdous      | 2020 | 4 | 4 | 4 | 3 | 2 |
| Glassman     | 2013 | 1 | 3 | 2 | 3 | 2 |
| Gopalan      | 2014 | 4 | 5 | 4 | 6 | 2 |
| Higginbottom | 2019 | 3 | 4 | 5 | 5 | 2 |
| Hollowell    | 2011 | 3 | 4 | 5 | 4 | 2 |
| Hunter (a)   | 2017 | 5 | 4 | 5 | 6 | 2 |
| Hunter (b)   | 2017 | 5 | 4 | 5 | 6 | 2 |
| Jhaveri      | 2021 | 2 | 5 | 0 | 3 | 2 |
| Kirubarajan  | 2022 | 4 | 5 | 4 | 5 | 2 |
| Knight       | 2013 | 3 | 5 | 3 | 3 | 2 |
| Kyei-Nimakoh | 2017 | 5 | 4 | 3 | 4 | 2 |
| Lagarde      | 2007 | 4 | 5 | 4 | 5 | 2 |
| Lagarde      | 2008 | 5 | 5 | 4 | 6 | 3 |
| Lassi        | 2012 | 5 | 5 | 5 | 6 | 2 |
| Lassi        | 2016 | 5 | 5 | 5 | 6 | 3 |
| Lee          | 2009 | 4 | 4 | 3 | 4 | 2 |
| Lewin        | 2010 | 5 | 5 | 5 | 6 | 3 |
| Lyall        | 2021 | 5 | 4 | 5 | 6 | 2 |
| Magwood      | 2018 | 4 | 4 | 5 | 6 | 2 |
| Magwood      | 2019 | 5 | 5 | 5 | 5 | 3 |
| Malqvist     | 2012 | 4 | 3 | 1 | 3 | 2 |
| Malqvist     | 2013 | 4 | 5 | 5 | 3 | 2 |
| McArthur     | 2013 | 5 | 5 | 3 | 5 | 2 |
| McCollum     | 2016 | 5 | 5 | 5 | 5 | 3 |
| Mengist      | 2021 | 5 | 5 | 5 | 6 | 3 |
| Moncrieff    | 2021 | 5 | 5 | 4 | 5 | 2 |
| Muralidharan | 2015 | 4 | 4 | 3 | 3 | 2 |
| Murray       | 2012 | 4 | 4 | 5 | 3 | 2 |
| Mutambudzi   | 2017 | 4 | 1 | 2 | 3 | 2 |
| Ogundele     | 2020 | 3 | 5 | 4 | 5 | 2 |

*Equity in prenatal healthcare services globally: An umbrella review*

|          |      |   |   |   |   |   |
|----------|------|---|---|---|---|---|
| Palmer   | 2020 | 5 | 5 | 5 | 6 | 3 |
| Prady    | 2019 | 5 | 3 | 4 | 5 | 3 |
| Rowe     | 2003 | 3 | 5 | 2 | 3 | 2 |
| Rowe     | 2004 | 3 | 5 | 3 | 3 | 2 |
| Sanogo   | 2019 | 4 | 4 | 5 | 6 | 3 |
| Say      | 2007 | 4 | 5 | 4 | 4 | 1 |
| Sidze    | 2021 | 4 | 4 | 3 | 6 | 2 |
| Small    | 2014 | 4 | 3 | 2 | 3 | 2 |
| Toh      | 2022 | 5 | 4 | 3 | 6 | 2 |
| Tokhi    | 2018 | 5 | 4 | 5 | 6 | 3 |
| Vanstone | 2019 | 2 | 3 | 1 | 2 | 2 |
| Victoria | 2012 | 4 | 2 | 1 | 4 | 2 |
| Walker   | 2019 | 5 | 4 | 4 | 5 | 2 |
| Watson   | 2019 | 5 | 5 | 5 | 4 | 2 |
| Wekesah  | 2016 | 4 | 5 | 3 | 5 | 2 |
| Widmer   | 2011 | 4 | 5 | 2 | 3 | 2 |
| Yuan     | 2012 | 4 | 3 | 2 | 5 | 2 |
| Yuan     | 2014 | 4 | 5 | 4 | 4 | 2 |
