# Supplementary material for: Equity in prenatal healthcare services globally: an umbrella review
Source: Springer Nature journal article supplement (doi:10.1186/s12884-024-06388-0), 2024-03-11
Supplement: MOESM5 [file 26840516]

**List of excluded studies and reason for exclusion**

| <b>Reason for Exclusion: Not in English language</b> |                            |                                                                                                                                                                                                 |
|------------------------------------------------------|----------------------------|-------------------------------------------------------------------------------------------------------------------------------------------------------------------------------------------------|
| <b>First Author Last Name</b>                        | <b>Year of Publication</b> | <b>Article Title</b>                                                                                                                                                                            |
| Masella                                              | 2020                       | Ethical issues of Internet use by pregnant women during their medical care                                                                                                                      |
| Sharifi                                              | 2018                       | The relationship of the structural and intermediate social determinants of health with low birth weight in Iran: A systematic review and meta-analysis                                          |
| <b>Reason for Exclusion: Not a systematic review</b> |                            |                                                                                                                                                                                                 |
| <b>First Author Last Name</b>                        | <b>Year of Publication</b> | <b>Article Title</b>                                                                                                                                                                            |
| Adjei                                                | 2019                       | Factors Influencing Uptake of Institutional Delivery Service by Skilled Birth Attendant's in Ghana: A Framework Analysis of Existing Literature                                                 |
| Albrecht                                             | 1994                       | Assessing the importance of family structure in understanding birth outcomes                                                                                                                    |
| Allen                                                | 2008                       | PSHE education on infant feeding: influencing young people's views                                                                                                                              |
| Allina                                               | 2009                       | New directions in reproductive health and justice advocacy: yes we can!                                                                                                                         |
| Penman-Aguilar                                       | 2013                       | Socioeconomic Disadvantage as a Social Determinant of Teen Childbearing in the U.S                                                                                                              |
| Andermann                                            | 2008                       | Revisiting Wilson and Jungner in the genomic age: a review of screening criteria over the past 40 years                                                                                         |
| Anderson                                             | 2018                       | Great Expectations: How Gendered expectations shape early mothering experiences                                                                                                                 |
| Aston                                                | 2014                       | Universal and targeted early home visiting: perspectives of public health nurses, managers and mothers                                                                                          |
| Azzopardi-Muscat                                     | 2019                       | Towards an equitable digital public health era: promoting equity through a health literacy perspective                                                                                          |
| Baily                                                | 2008                       | Ethics, evidence, and cost in newborn screening                                                                                                                                                 |
| Baldwin-Ragaven                                      | 2000                       | Learning from our apartheid past: Human rights challenges for health professionals in contemporary South Africa                                                                                 |
| Belkengren                                           | 2002                       | Pediatric management problems                                                                                                                                                                   |
| Benhalima                                            | 2016                       | Screening for gestational diabetes in Europe: Where do we stand and how to move forward?: A scientific paper commissioned by the European Board & College of Obstetrics and Gynaecology (EBCOG) |
| Berger                                               | 2000                       | Prenatal cocaine exposure: Long-run effects and policy implications                                                                                                                             |
| Bromley                                              | 2020                       | An imaging approach to early pregnancy failure                                                                                                                                                  |
| Broom                                                | 2008                       | Hazardous good intentions? Unintended consequences of the project of prevention                                                                                                                 |
| Brown                                                | 2019                       | Redefining postpartum care                                                                                                                                                                      |
| Bustreo                                              | 2010                       | Women's and children's health: from pledges to action                                                                                                                                           |
| Cambroner-Saiz                                       | 2013                       | Gender policies and advertising and marketing practices that affect women's health                                                                                                              |
| Campbell                                             | 2021                       | Pregnancy-Associated Deaths from Homicide, Suicide, and Drug Overdose: Review of Research and the Intersection with Intimate Partner Violence                                                   |
| Caprara                                              | 2016                       | Zika: exposing anew the need for health promotion in Latin America                                                                                                                              |
| Carlsen                                              | 2014                       | Maternal education and risk of offspring death; changing patterns from 16 weeks of gestation until one year after birth                                                                         |

*Equity in prenatal healthcare services globally: An umbrella review*

|                     |      |                                                                                                                                                    |
|---------------------|------|----------------------------------------------------------------------------------------------------------------------------------------------------|
| Chamberlain         | 2019 | Perinatal opportunities for addressing complex intergenerational trauma in Aboriginal and Torres Strait Islander communities                       |
| Chandler            | 2020 | Promoting Optimal Sexual and Reproductive Health with Mobile Health Tools for Black Women: Combining Technology, Culture and Context               |
| Chol                | 2018 | Health system reforms in five sub-Saharan African countries that experienced major armed conflicts (wars) during 1990–2015: a literature review    |
| Chrzan              | 2008 | Social support and nutrition during adolescent pregnancy: Effects on health outcomes of baby and mother                                            |
| Coleman             | 2015 | Diagnosis of Fetal Anomaly and the Increased Maternal Psychological Toll Associated with Pregnancy Termination                                     |
| Comrie-Thomson      | 2015 | Challenging gender inequity through male involvement in maternal and newborn health: Critical assessment of an emerging evidence base              |
| Connor              | 2020 | Health risks and outcomes that disproportionately affect women during the Covid-19 pandemic: A review                                              |
| Correa-De-Araujo    | 2021 | Clinical Outcomes in High-Risk Pregnancies Due to Advanced Maternal Age                                                                            |
| Crear-Perry         | 2021 | Social and Structural Determinants of Health Inequities in Maternal Health                                                                         |
| Dhami               | 2009 | Ethnicity and access to healthcare                                                                                                                 |
| Dixon               | 2008 | Rh(D) immunoglobulin -- what is the evidence for routine prophylaxis during pregnancy                                                              |
| Dixon               | 2019 | Non-invasive pre-natal screening (NIPS) in New Zealand                                                                                             |
| Dondorp             | 2015 | Non-invasive prenatal testing for aneuploidy and beyond: Challenges of responsible innovation in prenatal screening                                |
| Donnellan-Fernandez | 2018 | Cost-effectiveness of continuity of midwifery care for women with complex pregnancy: a structured review of the literature                         |
| Ensor               | 2004 | Overcoming barriers to health service access: influencing the demand side                                                                          |
| Esegbona-Adeigbe    | 2020 | COVID-19 and the risk to black, Asian and minority ethnic women during pregnancy                                                                   |
| Filippi             | 2016 | Levels and Causes of Maternal Mortality and Morbidity                                                                                              |
| Fisher              | 2010 | The social determinants of mental health: implications for research and health promotion                                                           |
| Fotso               | 2015 | Leveraging mobile technology to reduce barriers to maternal, newborn and child health care: a contribution to the evidence base                    |
| Foulkes             | 2005 | Opportunities for action: addressing Latina sexual and reproductive health                                                                         |
| Fowler              | 2013 | Use of maternity surveys in improving the care experience -- a review of the evidence                                                              |
| Garry               | 2020 | Armed conflict and public health: into the 21st century                                                                                            |
| Gayle               | 2016 | Female genital mutilation and pregnancy: associated risks                                                                                          |
| George              | 2018 | Gender dynamics in digital health: overcoming blind spots and biases to seize opportunities and responsibilities for transformative health systems |
| Getz                | 2001 | General practitioners and prenatal testing - follow the experts or scrutinise the issue?                                                           |
| Gottschang          | 2020 | Reproductive Modernities in Policy: Maternal Mortality, Midwives, and Cesarean Sections in China, 1900s–2000s                                      |
| Graham              | 2007 | Ethics in public health research: minding the gaps: a reassessment of the challenges to safe motherhood                                            |

*Equity in prenatal healthcare services globally: An umbrella review*

|                  |      |                                                                                                                                                                           |
|------------------|------|---------------------------------------------------------------------------------------------------------------------------------------------------------------------------|
| Graham           | 2010 | The public health nursing role in improving outcomes for Mississippi families: recent findings on Mississippi infant mortality                                            |
| Grant            | 2020 | Sexually Transmitted Infections in Pregnancy: A Narrative Review of the Global Research Gaps, Challenges, and Opportunities                                               |
| Griffen          | 2021 | Perinatal Mental Health Care In The United States: An Overview Of Policies And Programs                                                                                   |
| Hall             | 2014 | Assessing the impact of mHealth interventions in low- and middle-income countries – what has been shown to work?                                                          |
| Hammond          | 2014 | Exploring same sex couples’ experiences of maternity care                                                                                                                 |
| Harper           | 2021 | Health Care Experiences in Rural, Remote and Metropolitan Areas of Australia                                                                                              |
| Haws             | 2007 | Impact of packaged interventions on neonatal health: a review of the evidence                                                                                             |
| Hodgins          | 2016 | A New Look at Care in Pregnancy: Simple, Effective Interventions for Neglected Populations                                                                                |
| Holtkamp         | 2017 | Factors for successful implementation of population-based expanded carrier screening: learning from existing initiatives                                                  |
| Houweling        | 2019 | The equity impact of community women's groups to reduce neonatal mortality: a meta-analysis of four cluster randomized trials                                             |
| Hutchinson-Colas | 2022 | Pregnant Behind Bars                                                                                                                                                      |
| Jackson          | 2011 | Deafness and antenatal care: Understanding issues with access                                                                                                             |
| Jin              | 2020 | Systematic Review of Quality Improvement Processes, Interventions and Structure in Surgery, Obstetric, Trauma, and Anesthesia Systems in Low- and Middle-Income Countries |
| Khatri           | 2018 | Social determinants of health affecting utilisation of routine maternity services in Nepal: a narrative review of the evidence                                            |
| Knapp            | 2006 | Economic barriers to better mental health practice and policy                                                                                                             |
| Krumeich         | 2014 | Health in global context; beyond the social determinants of health?                                                                                                       |
| Lisa             | 2021 | Links between biodiversity and human infectious and non-communicable diseases: A review                                                                                   |
| Little           | 2019 | Cleft Birth Defects and Health Disparities                                                                                                                                |
| Lu               | 2003 | Racial and ethnic disparities in birth outcomes: a life-course perspective                                                                                                |
| Massie           | 2014 | Prenatal and preconception population carrier screening for cystic fibrosis in Australia: Where are we up to?                                                             |
| McCarthy         | 2019 | Pregnancy outcomes for women with pre-pregnancy diabetes mellitus in Australian populations, rural and metropolitan: A review                                             |
| McKinnon         | 2016 | Do Socioeconomic Inequalities in Neonatal Mortality Reflect Inequalities in Coverage of Maternal Health Services? Evidence from 48 Low- and Middle-Income Countries.      |
| Mingyang         | 2019 | Re: Global inequities in dietary calcium intake during pregnancy: a systematic review and meta-analysis                                                                   |
| Moncrieff        | 2018 | The cyclical and intergenerational effects of perinatal domestic abuse and mental health                                                                                  |
| Moore            | 2021 | Policy Opportunities To Improve Prevention, Diagnosis, And Treatment Of Perinatal Mental Health Conditions                                                                |
| Morgan           | 2017 | Thinking about the environment and theorising change: how could Life History Strategy Theory inform mHealth interventions in low- and middle-income countries?            |
| Mottola          | 2018 | 2019 Canadian guideline for physical activity throughout pregnancy                                                                                                        |
| Murphy           | 2008 | Preparation is everything                                                                                                                                                 |

*Equity in prenatal healthcare services globally: An umbrella review*

|               |      |                                                                                                                                                                                                   |
|---------------|------|---------------------------------------------------------------------------------------------------------------------------------------------------------------------------------------------------|
| Nahar         | 2019 | Cultural roadblocks on women's reproductive health rights: a qualitative interpretive meta-synthesis from South Asia and Sub-Saharan Africa                                                       |
| Nicholas      | 2021 | Review of international clinical guidelines related to prenatal screening during monochorionic pregnancies                                                                                        |
| O'Leary       | 2016 | Screening for Down syndrome in the second trimester of pregnancy                                                                                                                                  |
| Ochieng       | 2013 | Black African migrants: the barriers with accessing and utilizing health promotion services in the UK                                                                                             |
| Ogunwole      | 2020 | Community-Based Doulas and COVID-19: Addressing Structural and Institutional Barriers to Maternal Health Equity                                                                                   |
| Oliveira-Cruz | 2003 | Approaches to overcoming constraints to effective health service delivery: a review of the evidence                                                                                               |
| Pedersen      | 2012 | Immigrant women and maternal mortality in Western Europe: A meta-analysis of observational studies                                                                                                |
| Petticrew     | 2009 | Better evidence about wicked issues in tackling health inequities                                                                                                                                 |
| Phonyiam      | 2021 | Racial and Ethnic Disparities in Health Care and Health Outcomes for Pregnant Women With Diabetes                                                                                                 |
| Pierle        | 2019 | Genetic Service Delivery Models: Exploring approaches to care for families with hereditary cancer risk                                                                                            |
| Polacko       | 2021 | Causes and Consequences of Income Inequality – An Overview                                                                                                                                        |
| Quinn         | 2014 | Provision of maternity care for women in remote Far West New South Wales: How far have we come?                                                                                                   |
| Reading       | 2014 | Global maternal, newborn and child health - so near and yet so far                                                                                                                                |
| Requejo       | 2013 | Born Too Soon: Care during pregnancy and childbirth to reduce preterm deliveries and improve health outcomes of the preterm baby                                                                  |
| Rezaee        | 2017 | Does Spousal Support Can Increase the Women's Physical Activity?                                                                                                                                  |
| Rumbold       | 2008 | A review of the impact of antenatal care for Australian Indigenous women and attempts to strengthen these services                                                                                |
| Sanneving     | 2013 | Inequity in India: the case of maternal and reproductive health                                                                                                                                   |
| Schmied       | 2010 | The nature and impact of collaboration and integrated service delivery for pregnant women, children and families                                                                                  |
| Schmied       | 2013 | Maternal mental health in Australia and New Zealand: A review of longitudinal studies                                                                                                             |
| Kuhlmann      | 2016 | The importance of community mobilization in interventions to improve sexual, reproductive, and maternal health outcomes: A review of the evidence                                                 |
| Steel         | 2015 | Caesarean section by maternal request                                                                                                                                                             |
| Svanberg      | 1998 | Attachment, resilience and prevention                                                                                                                                                             |
| Tarasoff      | 2015 | Experiences of Women With Physical Disabilities During the Perinatal Period: A Review of the Literature and Recommendations to Improve Care                                                       |
| Taylor        | 2021 | The Importance of Respectful Maternity Care for Women of Color                                                                                                                                    |
| Tomasi        | 2004 | Health information technology in primary health care in developing countries: a literature review                                                                                                 |
| Wickremsinhe  | 2019 | Beyond "Vessels and Vectors": A Global Review of Registered HIV-Related Clinical Trials with Pregnant Women                                                                                       |
| Wright        | 2015 | Reproductive Health in the United States: A Review of the Recent Social Work Literature                                                                                                           |
| Yuan          | 2013 | Disadvantaged populations in maternal health in China who and why?                                                                                                                                |
| Zwi           | 2017 | The impact of health perceptions and beliefs on access to care for migrants and refugees                                                                                                          |
| Kildea        | 2019 | Reducing preterm births amongst Aboriginal and Torres Strait Islander babies with targeted interventions including increasing the indigenous workforce and providing continuity of midwifery care |
| N/A           | 2012 | Physical Health                                                                                                                                                                                   |

*Equity in prenatal healthcare services globally: An umbrella review*

|                                                                   |                            |                                                                                                                                                                 |
|-------------------------------------------------------------------|----------------------------|-----------------------------------------------------------------------------------------------------------------------------------------------------------------|
| N/A                                                               | 2012                       | Populations, Community, and Service Systems                                                                                                                     |
| N/A                                                               | 2012                       | Quality of Life                                                                                                                                                 |
| Bohren                                                            | 2018                       | Methodological development of tools to measure how women are treated during facility-based childbirth in four countries: labor observation and community survey |
| Crowe                                                             | 2022                       | Factors contributing to maternal health inequalities for women who are not white British in the UK                                                              |
| <b>Reason for Exclusion: No mention of "equit*" or "inequit*"</b> |                            |                                                                                                                                                                 |
| <b>First Author Last Name</b>                                     | <b>Year of Publication</b> | <b>Article Title</b>                                                                                                                                            |
| Adane                                                             | 2019                       | The impact of pre-pregnancy body mass index and gestational weight gain on placental abruption risk: a systematic review and meta-analysis                      |
| Adane                                                             | 2021                       | The impact of maternal prenatal mental health disorders on stillbirth and infant mortality: a systematic review and meta-analysis                               |
| Arab                                                              | 2018                       | Healthcare services for Syrian refugees in Jordan: a systematic review                                                                                          |
| Carey                                                             | 2018                       | What principles should guide visiting primary health care services in rural and remote communities? Lessons from a systematic review                            |
| Claire                                                            | 2020                       | Pharmacological interventions for promoting smoking cessation during pregnancy                                                                                  |
| Connolly                                                          | 2021                       | Mental health interventions by lay counsellors: a systematic review and meta-analysis                                                                           |
| de Jong                                                           | 2017                       | A systematic literature review on the use and outcomes of maternal and child healthcare services by undocumented migrants in Europe                             |
| Fisher                                                            | 2012                       | Prevalence and determinants of common perinatal mental disorders in women in low- and lower-middle-income countries: a systematic review                        |
| Grigoriadis                                                       | 2014                       | Prenatal exposure to antidepressants and persistent pulmonary hypertension of the newborn: systematic review and meta-analysis                                  |
| Jacques                                                           | 2019                       | Prenatal and postnatal maternal depression and infant hospitalization and mortality in the first year of life: A systematic review and meta-analysis            |
| Kingston                                                          | 2014                       | Prenatal and Postnatal Maternal Mental Health and School-Age Child Development: A Systematic Review                                                             |
| Lo                                                                | 2014                       | Estimating the burden of neural tube defects in low- and middle-income countries                                                                                |
| Matin                                                             | 2021                       | Barriers in access to healthcare for women with disabilities: a systematic review in qualitative studies                                                        |
| McGeough                                                          | 2020                       | Barriers and facilitators perceived by women while homeless and pregnant in accessing antenatal and or postnatal healthcare: A qualitative evidence synthesis   |
| Miah                                                              | 2013                       | Does transitional care improve neonatal and maternal health outcomes? A systematic review                                                                       |
| Nguyen                                                            | 2019                       | Maternal Healthcare Experiences of and Challenges for Women with Physical Disabilities in Low and Middle-Income Countries: A Review of Qualitative Evidence     |
| Norredam                                                          | 2010                       | Migrants' utilization of somatic healthcare services in Europe--a systematic review                                                                             |
| Ross                                                              | 2011                       | Risk for postpartum depression associated with assisted reproductive technologies and multiple births: a systematic review                                      |

*Equity in prenatal healthcare services globally: An umbrella review*

|                                                                                                      |                            |                                                                                                                                                                                  |
|------------------------------------------------------------------------------------------------------|----------------------------|----------------------------------------------------------------------------------------------------------------------------------------------------------------------------------|
| Shirzad                                                                                              | 2021                       | Prevalence of and reasons for women's, family members', and health professionals' preferences for cesarean section in Iran: a mixed-methods systematic review                    |
| Vang                                                                                                 | 2017                       | Are immigrants healthier than native-born Canadians? A systematic review of the healthy immigrant effect in Canada                                                               |
| Benkert                                                                                              | 2019                       | Ubiquitous Yet Unclear: A Systematic Review of Medical Mistrust                                                                                                                  |
| Khan                                                                                                 | 2021                       | Ethnic health inequalities in the UK's maternity services: a systematic literature review                                                                                        |
| <b>Reason for Exclusion: Not an interaction with the healthcare system</b>                           |                            |                                                                                                                                                                                  |
| <b>First Author Last Name</b>                                                                        | <b>Year of Publication</b> | <b>Article Title</b>                                                                                                                                                             |
| Bollini                                                                                              | 2009                       | Pregnancy outcome of migrant women and integration policy: A systematic review of the international literature                                                                   |
| Carvalho                                                                                             | 2021                       | A Systematic Policy Review of Black Maternal Health-Related Policies Proposed Federally and in Massachusetts: 2010-2020                                                          |
| Harris-Fry                                                                                           | 2017                       | Determinants of intra-household food allocation between adults in South Asia - a systematic review                                                                               |
| Huertas-Zurriaga                                                                                     | 2021                       | Motherhood and decision-making among women living with HIV in developed countries: a systematic review with qualitative research synthesis                                       |
| O'Brien                                                                                              | 2018                       | The influence of socioeconomic status on gestational weight gain: a systematic review                                                                                            |
| Saweri                                                                                               | 2021                       | Economic evaluation of point-of-care testing and treatment for sexually transmitted and genital infections in pregnancy in low- and middle-income countries: A systematic review |
| Vizheh                                                                                               | 2021                       | Women empowerment in reproductive health: a systematic review of measurement properties                                                                                          |
| Lunze                                                                                                | 2015                       | Innovative approaches for improving maternal and newborn health--A landscape analysis                                                                                            |
| Miller                                                                                               | 2016                       | Beyond too little, too late and too much, too soon: a pathway towards evidence-based, respectful maternity care worldwide                                                        |
| Gil-González                                                                                         | 2006                       | Knowledge gaps in scientific literature on maternal mortality: a systematic review                                                                                               |
| Heitkamp                                                                                             | 2021                       | Maternal mortality: near-miss events in middle-income countries, a systematic review                                                                                             |
| Mac-Seing                                                                                            | 2020                       | Pro-equity legislation, health policy and utilisation of sexual and reproductive health services by vulnerable populations in sub-Saharan Africa: a systematic review            |
| Oliveira-Cruz                                                                                        | 2003                       | Approaches to overcoming constraints to effective health service delivery: a review of the evidence                                                                              |
| Chmielewska                                                                                          | 2021                       | Effects of the COVID-19 pandemic on maternal and perinatal outcomes: a systematic review and meta-analysis                                                                       |
| Demetrio                                                                                             | 2020                       | Food insecurity in pregnant women is associated with social determinants and nutritional outcomes: a systematic review and meta-analysis                                         |
| Lassi                                                                                                | 2016                       | Systematic review on human resources for health interventions to improve maternal health outcomes: evidence from low- and middle-income countries                                |
| VanDenBerg                                                                                           | 2017                       | Patient-centered early pregnancy care: a systematic review of quantitative and qualitative studies on the perspectives of women and their partners                               |
| <b>Reason for Exclusion: Does not report how equity/inequity influences prenatal care/experience</b> |                            |                                                                                                                                                                                  |
| <b>First Author Last Name</b>                                                                        | <b>Year of Publication</b> | <b>Article Title</b>                                                                                                                                                             |

*Equity in prenatal healthcare services globally: An umbrella review*

|              |      |                                                                                                                                                                                               |
|--------------|------|-----------------------------------------------------------------------------------------------------------------------------------------------------------------------------------------------|
| Adegbosin    | 2019 | Systematic review and meta-analysis of the association between dimensions of inequality and a selection of indicators of Reproductive, Maternal, Newborn and Child Health (RMNCH)             |
| Amoo         | 2019 | Are there traditional practices that affect men's reproductive health in sub-Saharan Africa? A systematic review and meta-analysis approach                                                   |
| Asciutto     | 2020 | A systematic review of economic evaluations of neonatal and maternal healthcare in immigrant and ethnic minority women                                                                        |
| Attree       | 2005 | Low-income mothers, nutrition and health: a systematic review of qualitative evidence                                                                                                         |
| Bhat         | 2021 | Ethnic variation in causes of stillbirth in high income countries: A systematic review and meta-analysis                                                                                      |
| Batchelor    | 2021 | A Systematic Review of Child Health and Developmental Outcomes Associated with Low Birthweight and/or Small for Gestational Age in Indigenous Children from Australia, Canada and New Zealand |
| Correia      | 2021 | Telemedicine to deliver diabetes care in low- and middle-income countries: a systematic review and meta-analysis                                                                              |
| Cyril        | 2015 | Exploring the role of community engagement in improving the health of disadvantaged populations: a systematic review                                                                          |
| Engström     | 2001 | Is general practice effective? A systematic literature review                                                                                                                                 |
| Gebremedhin  | 2022 | Evaluations of effective coverage of maternal and child health services: A systematic review                                                                                                  |
| Lazzerini    | 2018 | Effectiveness of the facility-based maternal near-miss case reviews in improving maternal and newborn quality of care in low-income and middle-income countries: a systematic review          |
| Long         | 2018 | Prevalence of and reasons for women's, family members', and health professionals' preferences for cesarean section in China: A mixed-methods systematic review                                |
| Rahman       | 2013 | Interventions for common perinatal mental disorders in women in low- and middle-income countries: a systematic review and meta-analysis                                                       |
| Saad         | 2021 | Mobile interventions targeting common mental disorders among pregnant and postpartum women: An equity-focused                                                                                 |
| Shakibazadeh | 2017 | Respectful care during childbirth in health facilities globally: a qualitative evidence synthesis                                                                                             |
| Smylie       | 2010 | A review of Aboriginal infant mortality rates in Canada: striking and persistent Aboriginal/non-Aboriginal inequities                                                                         |
| Verhoeven    | 2007 | The contribution of teleconsultation and videoconferencing to diabetes care: A systematic literature review                                                                                   |
| Maness       | 2016 | Associations Between Social Determinants of Health and Pregnancy Among Young People: A Systematic Review of Research Published During the Past 25 Years                                       |
| Mengesha     | 2020 | Disrespect and Abuse during Childbirth in Ethiopia: A Systematic Review                                                                                                                       |
| Lazzerini    | 2020 | Antenatal screening practices in the WHO European Region: a mixed methods study                                                                                                               |
| Kozuki       | 2013 | The associations of birth intervals with small-for-gestational-age, preterm, and neonatal and infant mortality: a meta-analysis                                                               |
| Fiorati      | 2018 | Social inequities and intersectoriality: Challenge to primary health care                                                                                                                     |
| Lagarde      | 2009 | The impact of conditional cash transfers on health outcomes and use of health services in low and middle income countries                                                                     |
| Djatmika     | 2021 | Caesarean section as an informed choice in the UK: a systematic review                                                                                                                        |

*Equity in prenatal healthcare services globally: An umbrella review*

|            |      |                                                                                                                                                                          |
|------------|------|--------------------------------------------------------------------------------------------------------------------------------------------------------------------------|
| Gopalan    | 2017 | Maternal and neonatal service usage and determinants in fragile and conflict-affected situations: a systematic review of Asia and the Middle-East.                       |
| Goudet     | 2019 | Nutritional interventions for preventing stunting in children (birth to 59 months) living in urban slums in low- and middle-income countries (LMIC) (Review)             |
| Hata       | 2020 | A Systematic Review of Racial and Ethnic Disparities in Maternal Health Outcomes among Asians/Pacific Islanders                                                          |
| Henderson  | 2021 | Aspirin Use to Prevent Preeclampsia and Related Morbidity and Mortality Updated Evidence Report and Systematic Review for the US Preventive Services Task Force          |
| Kim        | 2013 | The Social Determinants of Infant Mortality and Birth Outcomes in Western Developed Nations: A Cross-Country Systematic Review                                           |
| Kolahdooz  | 2015 | Understanding the social determinants of health among Indigenous Canadians: priorities for health promotion policies and actions                                         |
| Lassi      | 2013 | Quality of care provided by mid-level health workers: a systematic review and meta-analysis                                                                              |
| Mandal     | 2017 | A review of measures of women's empowerment and related gender constructs in family planning and maternal health program evaluations in low- and middle-income countries |
| Odendaal   | 2018 | Contracting out to improve the use of clinical health services and health outcomes in low- and middle-income countries                                                   |
| Pedersen   | 2014 | Maternal Mortality Among Migrants in Western Europe: A Meta-Analysis                                                                                                     |
| Pedersen   | 2021 | Interventions to reduce preterm birth in pregnant women with psychosocial vulnerability factors—A systematic review                                                      |
| Simonovich | 2021 | Meta-Analysis Of Antenatal Depression And Adverse Birth Outcomes In US Populations, 2010–20                                                                              |
